# Supplementary material for: The virulence factor LecB varies in clinical isolates: consequences for ligand binding and drug discovery
Source: PubMed Central journal article supplement (PMC6018602; doi:10.1039/c6sc00696e), 2016-05-11
Supplement: SC-007-C6SC00696E-s001.pdf [file SC-007-C6SC00696E-s001.pdf]

Supporting Information to

**The virulence factor LecB varies in clinical isolates:  
consequences for ligand binding and drug discovery**

Roman Sommer<sup>1,2#</sup>, Stefanie Wagner<sup>1,2#</sup>, Annabelle Varrot<sup>3</sup>, Corwin M. Nycholat<sup>4</sup>, James C. Paulson<sup>4</sup>, Ariane Khaledi<sup>5</sup>, Susanne Häussler<sup>5</sup>, Anne Imberty<sup>3</sup>, Alexander Titz<sup>1,2\*</sup>

<sup>1</sup> Chemical Biology of Carbohydrates, Helmholtz Institute for Pharmaceutical Research Saarland (HIPS), D-66123 Saarbrücken, Germany

<sup>2</sup> Deutsches Zentrum für Infektionsforschung (DZIF), Standort Hannover–Braunschweig (Germany)

<sup>3</sup> Centre de Recherche sur les Macromolécules Végétales (CERMAV-UPR5301), CNRS and Université Grenoble Alpes, BP53, F-38041 Grenoble cedex 9, France

<sup>4</sup> Department of Cell and Molecular Biology and Department of Chemical Physiology, The Scripps Research Institute, 10550 North Torrey Pines Road, La Jolla, CA 92037, USA

<sup>5</sup> Molecular Bacteriology, Helmholtz Centre for Infection Research, D-38124 Braunschweig, Germany



## UV straight calibration line

| A280  |       |       |       |        |          |        |
|-------|-------|-------|-------|--------|----------|--------|
| µg/mL | A280  | A280  | A280  | M A280 | STD A280 | µM     |
| 30    | 1,690 | 1,646 | 1,528 | 1,621  | 0,084    | 77,046 |
| 15    | 0,919 | 1,004 | 0,884 | 0,936  | 0,062    | 38,523 |
| 7,5   | 0,473 | 0,525 | 0,446 | 0,481  | 0,040    | 19,261 |
| 3,75  | 0,245 | 0,247 | 0,213 | 0,235  | 0,019    | 9,631  |
| 1,87  | 0,166 | 0,117 | 0,084 | 0,122  | 0,041    | 4,803  |
| 0,93  | 0,049 | 0,091 | 0,038 | 0,059  | 0,028    | 2,388  |
| 0,47  | 0,020 | 0,021 | 0,025 | 0,022  | 0,003    | 1,207  |

  

| A495  |       |       |       |        |          |            |
|-------|-------|-------|-------|--------|----------|------------|
| µg/mL | A495  | A495  | A495  | M A495 | STD A495 | rA495/A280 |
| 30    | 1,375 | 1,495 | 1,280 | 1,383  | 0,108    | 0,853      |
| 15    | 1,523 | 1,270 | 1,538 | 1,444  | 0,151    | 1,543      |
| 7,5   | 1,108 | 1,105 | 0,977 | 1,063  | 0,075    | 2,209      |
| 3,75  | 0,599 | 0,598 | 0,520 | 0,572  | 0,045    | 2,435      |
| 1,87  | 0,317 | 0,320 | 0,238 | 0,292  | 0,047    | 2,384      |
| 0,93  | 0,149 | 0,172 | 0,095 | 0,139  | 0,040    | 2,337      |
| 0,47  | 0,068 | 0,071 | 0,048 | 0,062  | 0,013    | 2,833      |

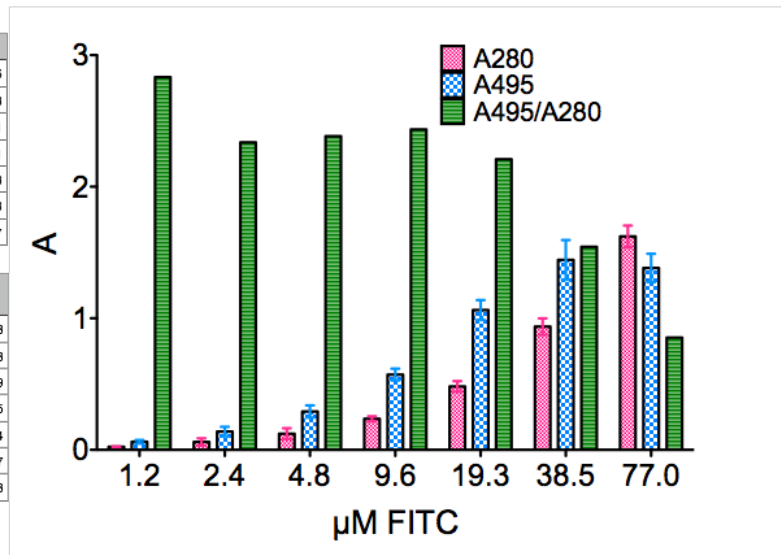

LINEAR RANGE: 0-20 µM FITC in TBS/Ca

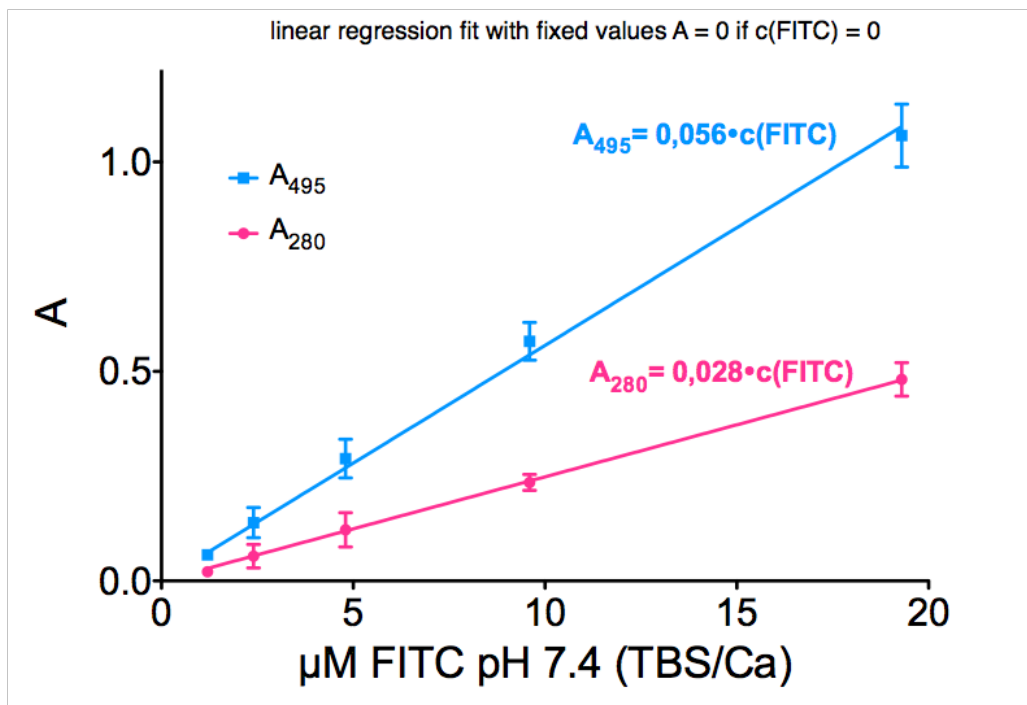

$$\rightarrow C_{\text{labeled LecB}} = \frac{A_{280} - 0.028 \cdot \frac{A_{495}}{0.056}}{6990}$$

**Figure S2:** concentration determination of FITC-labeled lectin LecB<sub>PAO1</sub> and LecB<sub>PA14</sub> by UV absorbance measurements



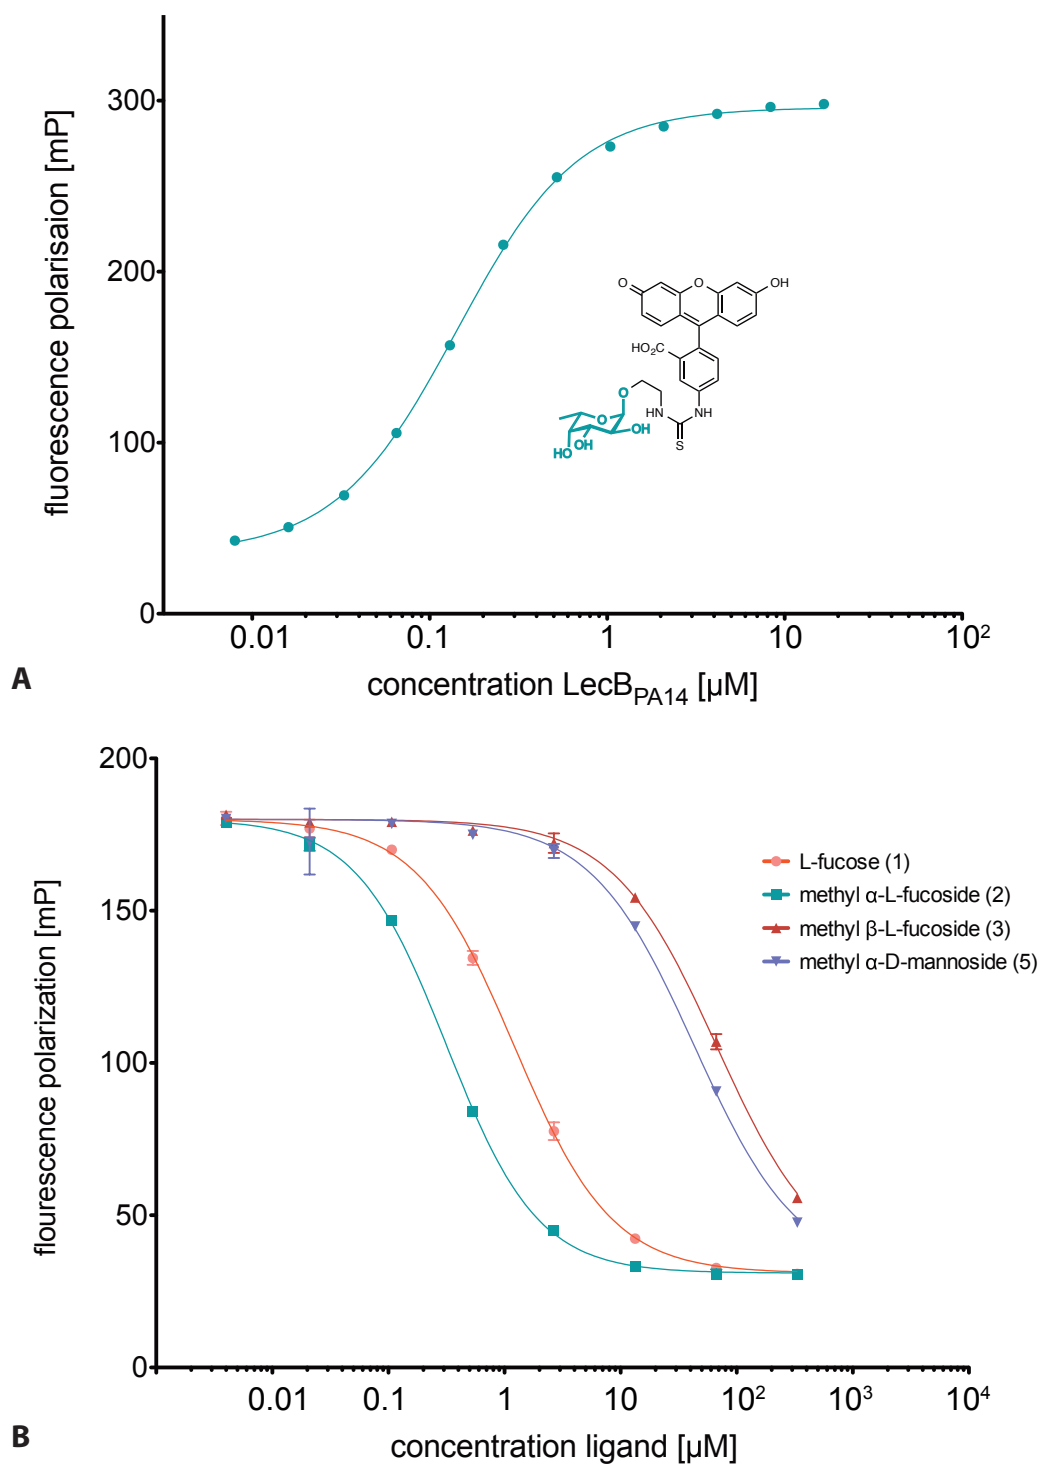

**Figure S5:** (A) Titration of fluorescein-labeled fucose-based reporter ligand N-(fluorescein-5-yl)-N'-( $\alpha$ -L-fucopyranosyl ethylen)-thiocarbamide (Hauck *et al*, ACS Chem. Biol., 2013) at 10 nM with LecB<sub>PA14</sub> and determination of the fluorescence polarization. (B) Competitive inhibition of the binding of N-(fluorescein-5-yl)-N'-( $\alpha$ -L-fucopyranosyl ethylen)-thiocarbamide (10 nM) to LecB<sub>PA14</sub> (100 nM) with various ligands. One representative titration of triplicates is shown and error bars shown here represent standard deviation of triplicates on one plate.

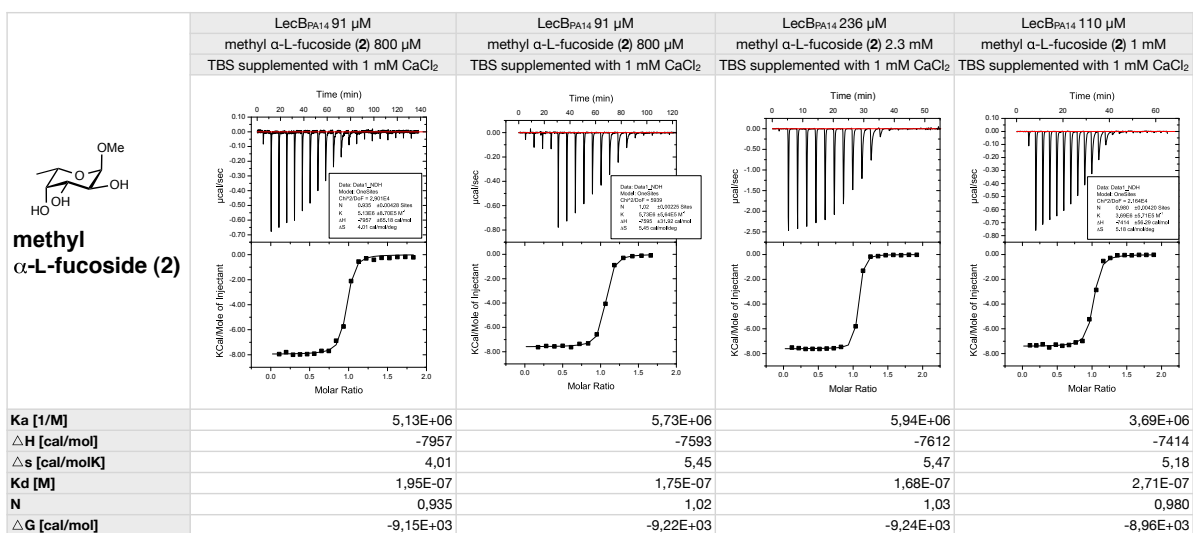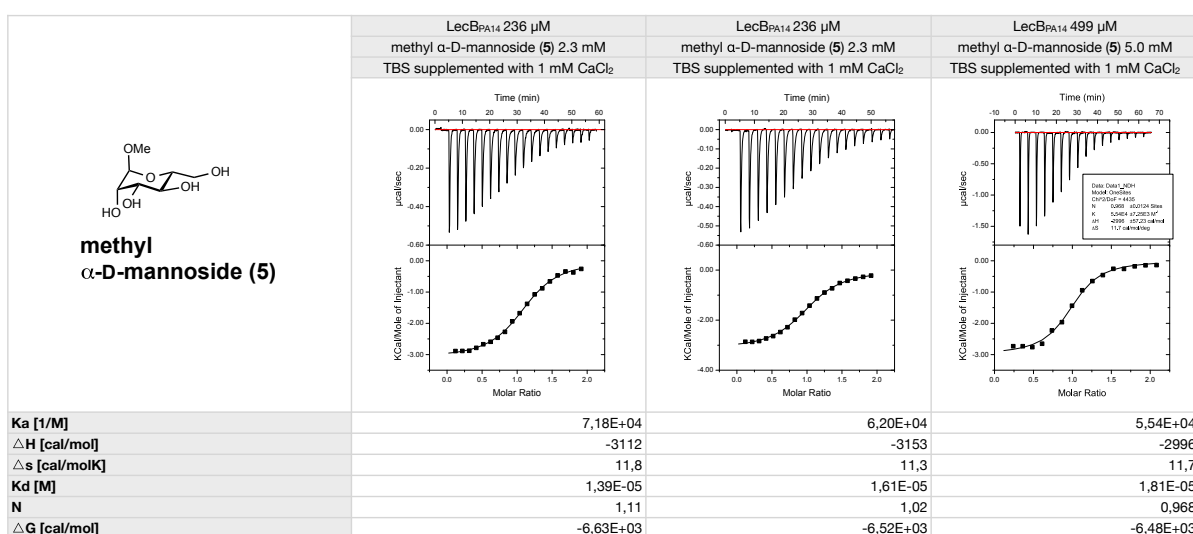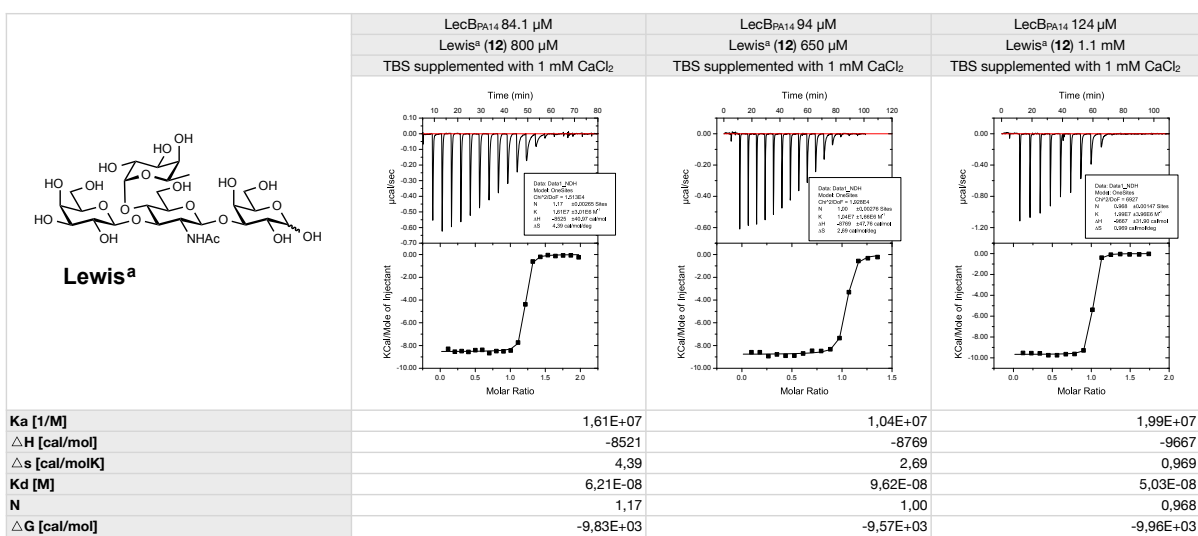

**Figure S6:** Isothermal microcalorimetry of LecB<sub>PA14</sub> with methyl α-L-fucoside (2), methyl α-D-mannoside (5) and with Lewis<sup>a</sup> (12)

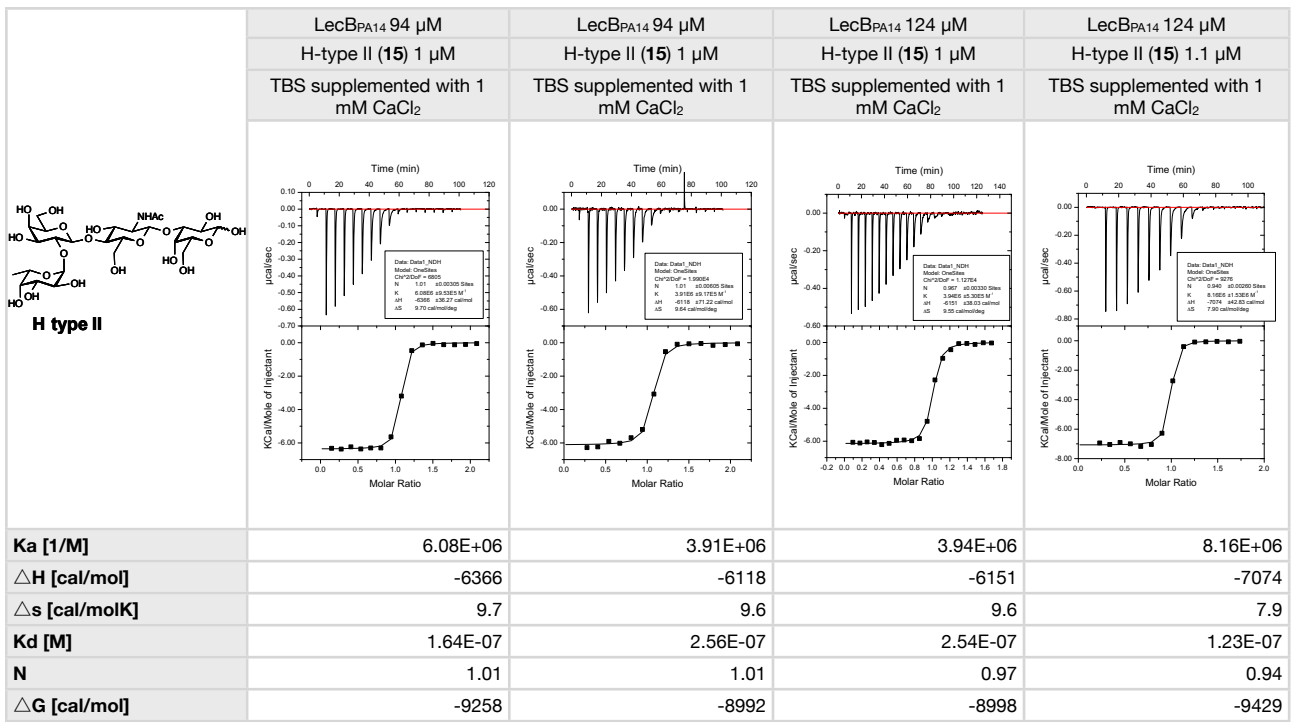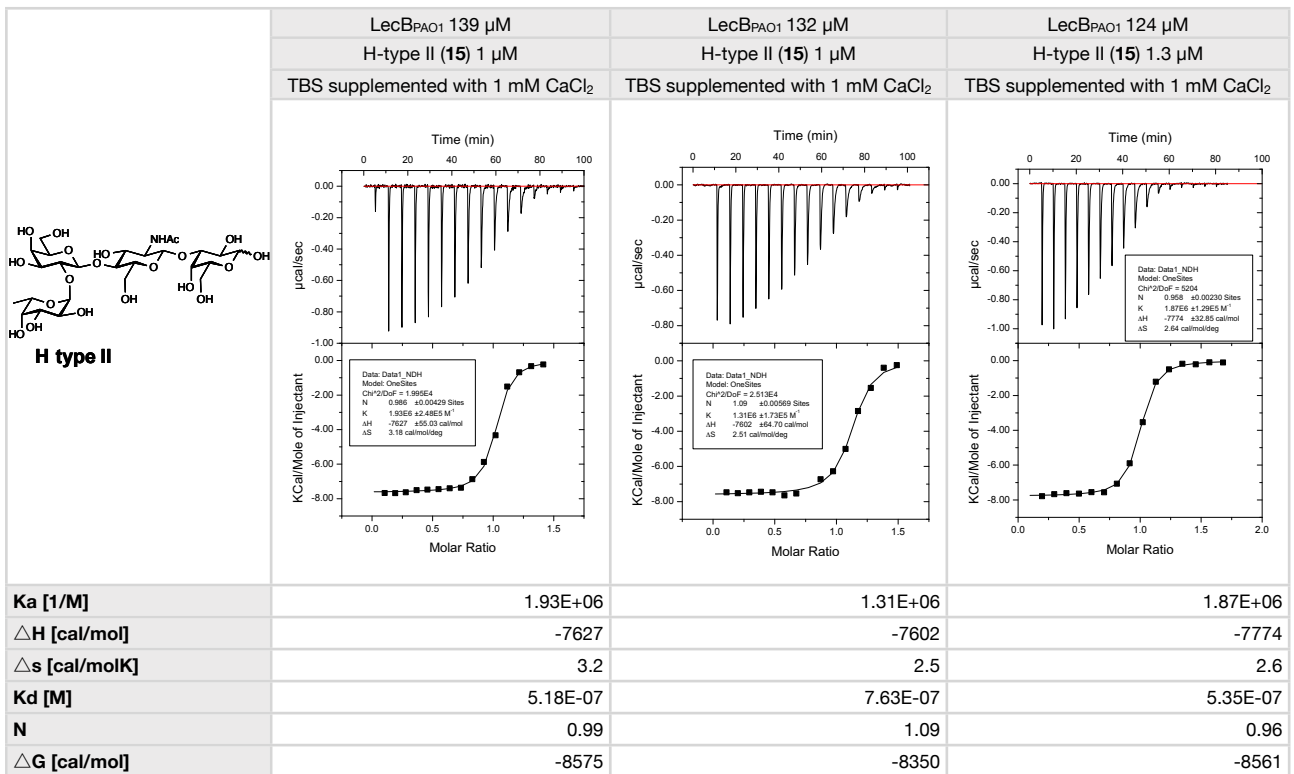

Figure S7: Isothermal microcalorimetry of LecB<sub>PA14</sub> (top row) and LecB<sub>PAO1</sub> (bottom row) with H-type II antigen (15).

TOF/TOF™ Reflector Spec #1[BP = 1003.8, 4066]

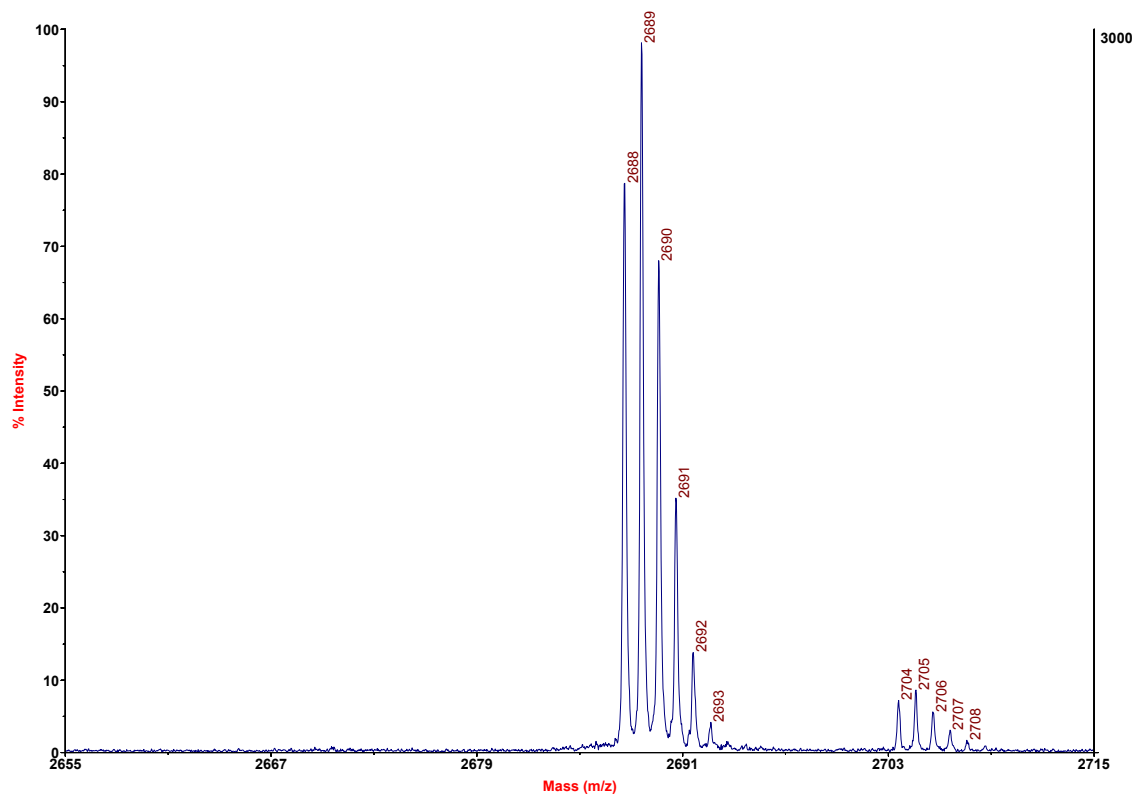

Ms1\_185531.T2D  
Acquired:

CN-15-122

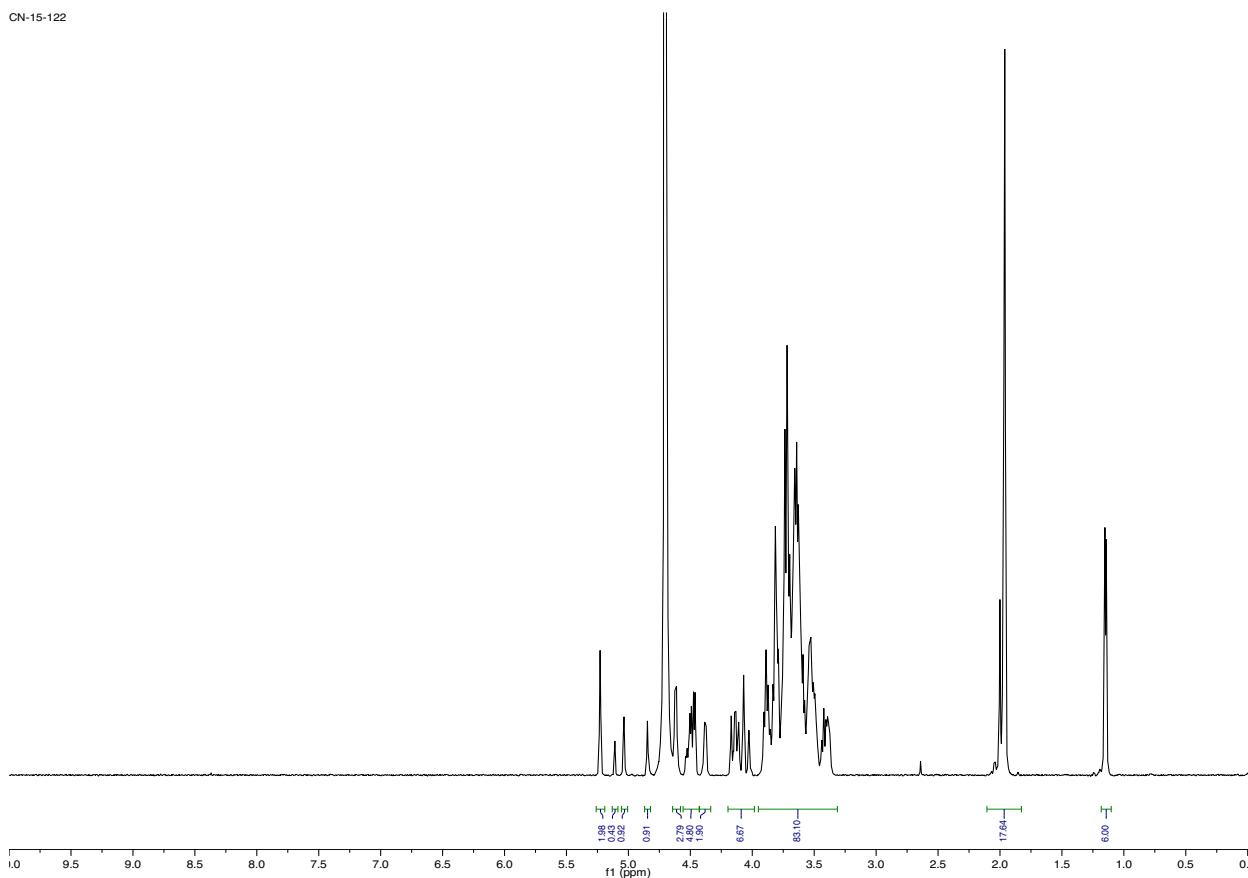

Figure S8: MALDI-MS (top) and <sup>1</sup>H-NMR (bottom) of divalent N-glycan **23**.



# Generic Display Report

## Analysis Info

Analysis Name D:\Data\C BCH\Roman\RS-b-303\RS-b-303MS\_CN543.d  
Method MS-NglycanRS-b-303.m  
Sample Name RS-b-303AutoMSN-CN543  
Comment

Acquisition Date 12/15/2015 4:43:46 PM  
Operator cbch  
Instrument amaZon SL

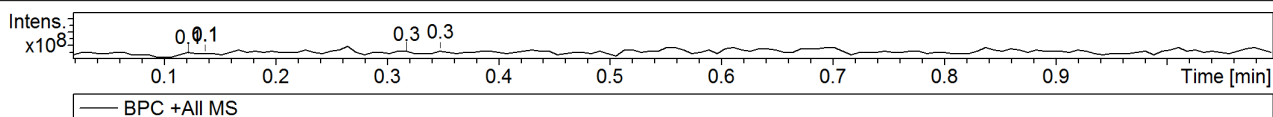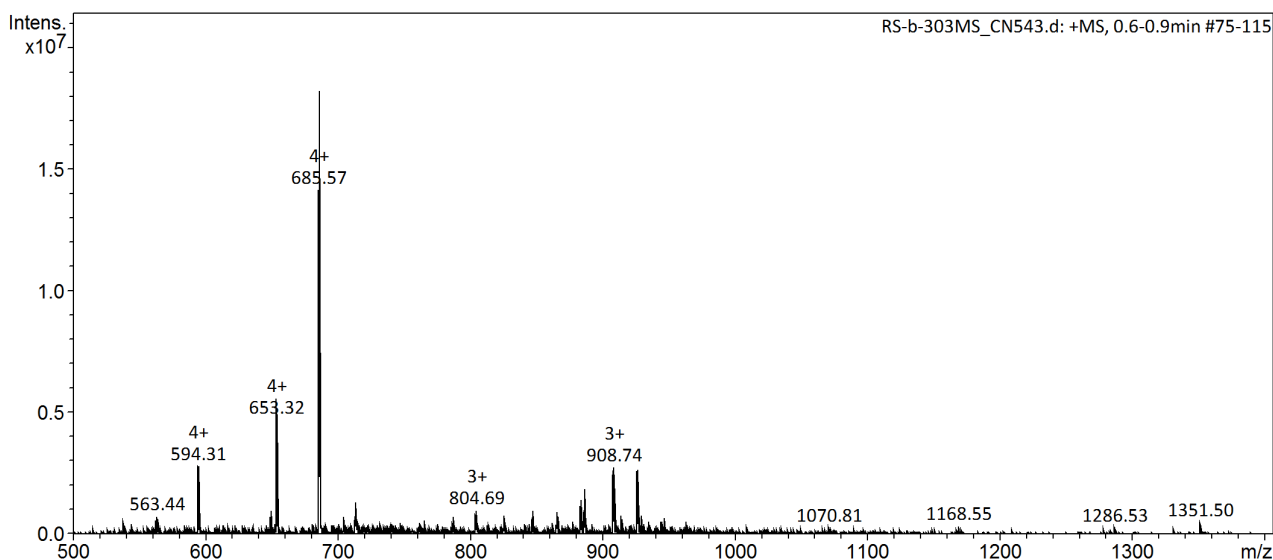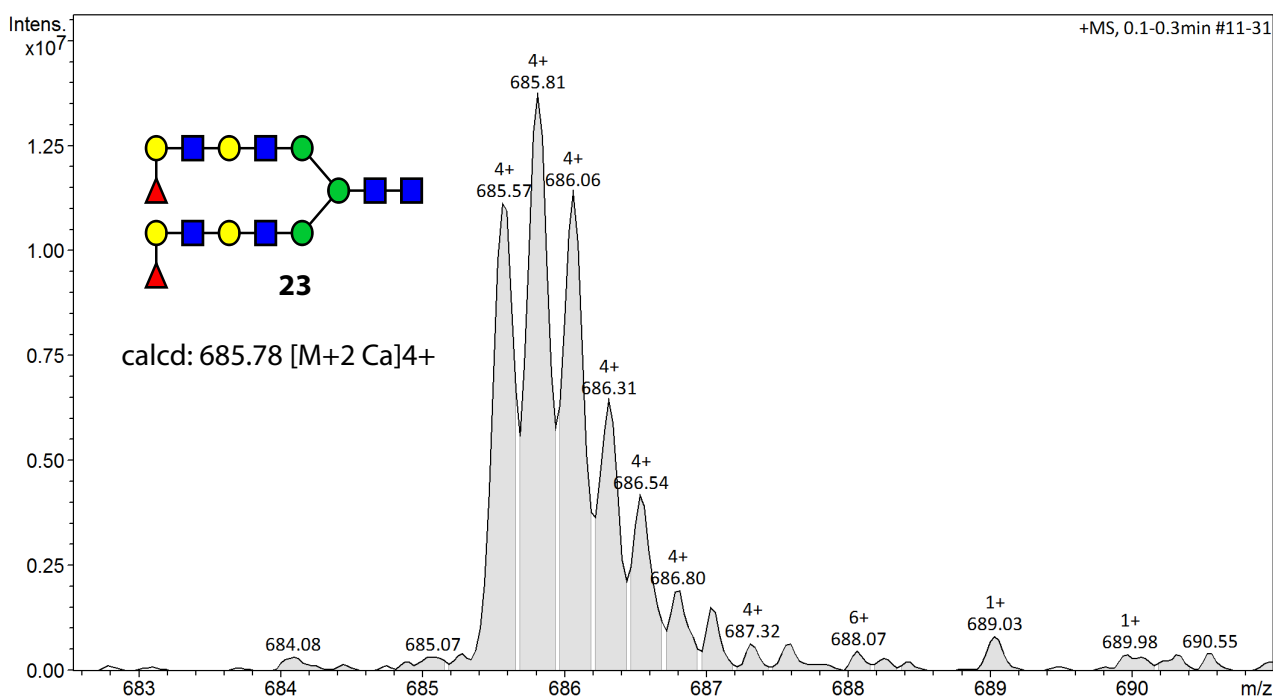

**Figure S9:** ESI-MS of of divalent N-glycan **23** in presence of 300  $\mu$ M CaCl<sub>2</sub>.

# Generic Display Report

## Analysis Info

|               |                                                        |                  |                       |
|---------------|--------------------------------------------------------|------------------|-----------------------|
| Analysis Name | D:\Data\CBCH\Roman\RS-b-303\RS-b-303MSn-1351_CN543-3.d | Acquisition Date | 12/15/2015 5:06:33 PM |
| Method        | MSn-1351-NglycanRS-b-303.m                             | Operator         | cbch                  |
| Sample Name   | RS-b-303AutoMSN-CN543                                  | Instrument       | amaZon SL             |
| Comment       |                                                        |                  |                       |

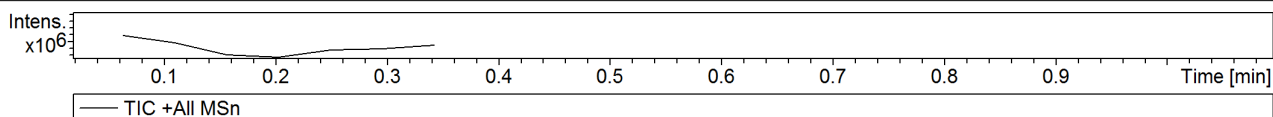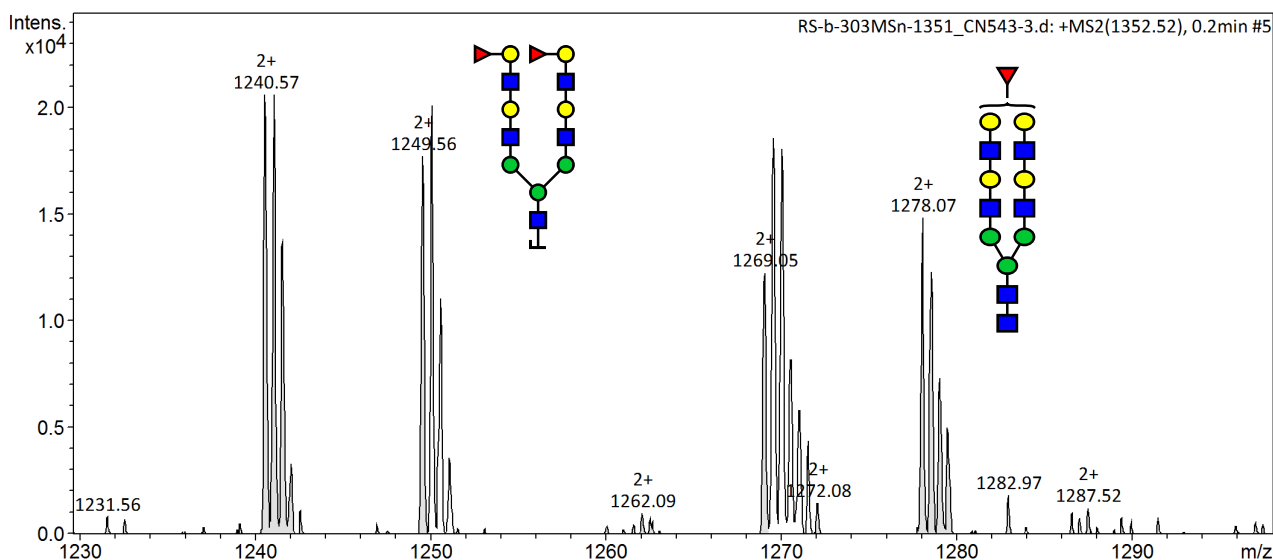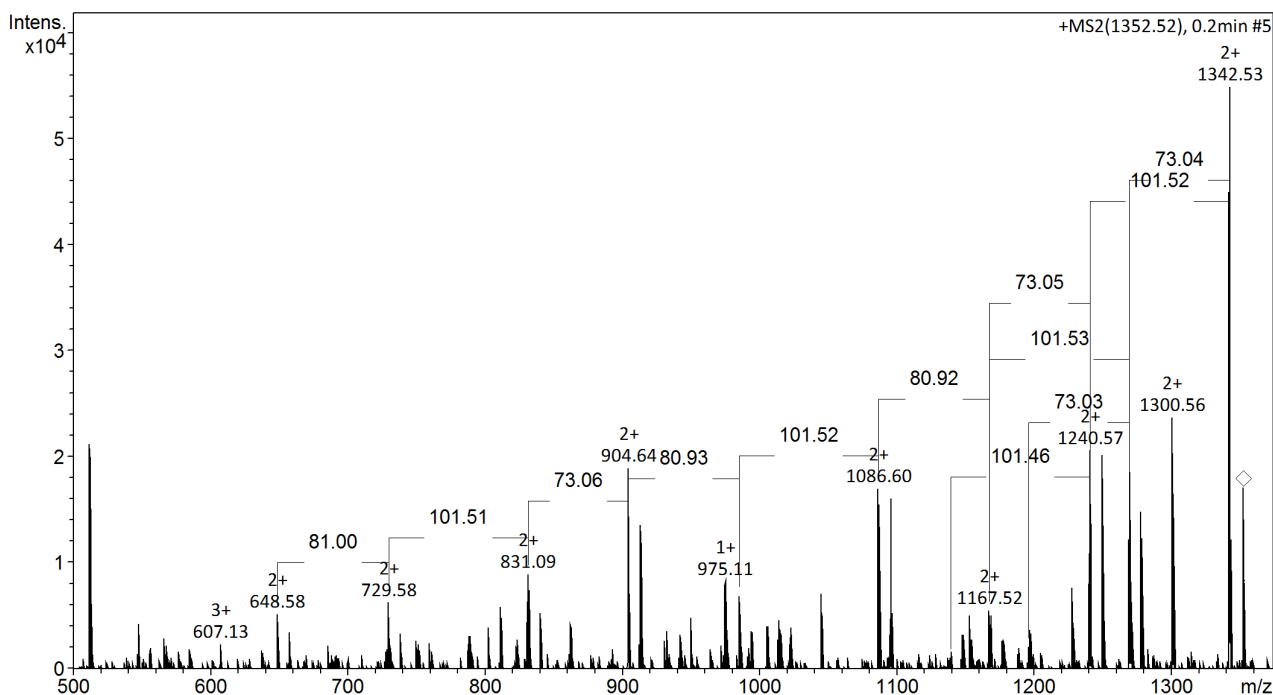

**Figure S10:** ESI-MS<sup>2</sup> of divalent N-glycan **23** in presence of 300  $\mu$ M CaCl<sub>2</sub>. m/z 1342.5 corresponds to [M-H<sub>2</sub>O+Ca]<sup>2+</sup>, loss of Fuc ( $\Delta$ m/z = 73), Hex ( $\Delta$ m/z = 81) and GlcNAc ( $\Delta$ m/z = 101.5).



**Table S1: Data Collection and Refinement Statistics for LecB<sub>PA14</sub> structures**

| Data-collection statistics                            |                                                        |      |      |      |                                                            |      |      |      |                                                       |      |      |      |                                                       |      |      |      |
|-------------------------------------------------------|--------------------------------------------------------|------|------|------|------------------------------------------------------------|------|------|------|-------------------------------------------------------|------|------|------|-------------------------------------------------------|------|------|------|
| Complex                                               | Native                                                 |      |      |      | Me- $\alpha$ -L-Fuc (2)                                    |      |      |      | Man- $\alpha$ 1,3-Man (11)                            |      |      |      | Lewis <sup>a</sup> (12)                               |      |      |      |
| Crystallization conditions                            | 22% Peg8K, 0.2 M AMSO <sub>4</sub> , 0.1 M Tris pH 8.5 |      |      |      | 26% Peg8K, 1 M AMSO <sub>4</sub> , 0.1M Citric acid pH 3.8 |      |      |      | 24% Peg8K, 0.2 M AMSO <sub>4</sub> , 0.1M Tris pH 8.5 |      |      |      | 22% Peg8K, 0.2 M AMSO <sub>4</sub> , 0.1M Tris pH 8.5 |      |      |      |
| cryoprotectant                                        | 10% glycerol added                                     |      |      |      | none                                                       |      |      |      | 10% glycerol added                                    |      |      |      | Increase Peg8K to 30%                                 |      |      |      |
| Beamline ESRF                                         | BM30A                                                  |      |      |      | BM30A                                                      |      |      |      | ID23-1                                                |      |      |      | BM30A                                                 |      |      |      |
| Wavelength (Å)                                        | 0.92053                                                |      |      |      | 0.92053                                                    |      |      |      | 0.8726                                                |      |      |      | 0.98021                                               |      |      |      |
| Spacegroup                                            | P2 <sub>1</sub>                                        |      |      |      | P2 <sub>1</sub> 2 <sub>1</sub> 2 <sub>1</sub>              |      |      |      | P2 <sub>1</sub>                                       |      |      |      | P2 <sub>1</sub>                                       |      |      |      |
| Unit cell: a,b,c (Å) $\alpha,\beta,\gamma$ (°)        | 52.9 49.6 75.5<br>90.0 93.4 90.0                       |      |      |      | 52.5 65.6 109.0<br>90.0 90.0 90.0                          |      |      |      | 53.0 49.8 75.3<br>90.0 93.3 90.0                      |      |      |      | 53.0 63.8 64.5<br>90.0 91.2 90.0                      |      |      |      |
| Resolution (outer shell), (Å)                         | 41.42-1.7 (1.73-1.70)                                  |      |      |      | 37.84-1.55 (1.58-1.55)                                     |      |      |      | 44.52-1.4 (1.42-1.40)                                 |      |      |      | 27.82-1.50 (1.53-1.50)                                |      |      |      |
| Measured/ Unique reflections                          | 138777/43091                                           |      |      |      | 352300/55470                                               |      |      |      | 242799/76843                                          |      |      |      | 237721/66333                                          |      |      |      |
| Average multiplicity                                  | 3.2 (3.2)                                              |      |      |      | 6.4 (4.6)                                                  |      |      |      | 3.2 (2.4)                                             |      |      |      | 3.6 (2.7)                                             |      |      |      |
| R <sub>merge</sub>                                    | 0.079 (0.295)                                          |      |      |      | 0.067 (0.392)                                              |      |      |      | 0.037 (0.178)                                         |      |      |      | 0.028 (0.147)                                         |      |      |      |
| Completeness (%)                                      | 99.7 (99.0)                                            |      |      |      | 99.9 (98.5)                                                |      |      |      | 99.4 (94.9)                                           |      |      |      | 96.5 (72.4)                                           |      |      |      |
| Mean I / $\sigma$ I                                   | 10.1 (3.4)                                             |      |      |      | 20.9 (3.4)                                                 |      |      |      | 21 (5.4)                                              |      |      |      | 26.9 (5.6)                                            |      |      |      |
| CC1/2                                                 | 0.992 (0.831)                                          |      |      |      | 0.999 (0.867)                                              |      |      |      | 0.999 (0.931)                                         |      |      |      | 0.999 (0.959)                                         |      |      |      |
| R <sub>cryst</sub> / R <sub>free</sub>                | 15.7/19.7                                              |      |      |      | 12.8/15.3                                                  |      |      |      | 12.2/16.3                                             |      |      |      | 13.0/15.5                                             |      |      |      |
| nb reflections/free reflections                       | 40973/2104                                             |      |      |      | 52637/2763                                                 |      |      |      | 72808/4016                                            |      |      |      | 62930/3384                                            |      |      |      |
| R <sub>msd</sub> bonds, (Å)                           | 0.017                                                  |      |      |      | 0.015                                                      |      |      |      | 0.017                                                 |      |      |      | 0.015                                                 |      |      |      |
| R <sub>msd</sub> angles (°)                           | 1.60                                                   |      |      |      | 1.64                                                       |      |      |      | 1.80                                                  |      |      |      | 1.71                                                  |      |      |      |
| Rmsd chiral (Å <sup>3</sup> )                         | 0.099                                                  |      |      |      | 0.10                                                       |      |      |      | 0.113                                                 |      |      |      | 0.095                                                 |      |      |      |
| Chain                                                 | A                                                      | B    | C    | D    | A                                                          | B    | C    | D    | A                                                     | B    | C    | D    | A                                                     | B    | C    | D    |
| Protein atoms                                         | 835                                                    | 831  | 844  | 838  | 838                                                        | 838  | 817  | 817  | 843                                                   | 843  | 846  | 828  | 852                                                   | 843  | 844  | 839  |
| Bfac (Å <sup>2</sup> )                                | 7.6                                                    | 7.3  | 5.2  | 5.6  | 7.6                                                        | 7.6  | 8.0  | 8.0  | 9.3                                                   | 8.8  | 7.3  | 7.7  | 10.3                                                  | 10.2 | 8.9  | 8.7  |
| Calcium                                               | 2                                                      | 2    | 2    | 2    | 2                                                          | 2    | 2    | 2    | 2                                                     | 2    | 2    | 2    | 2                                                     | 2    | 2    | 2    |
| Bfac (Å <sup>2</sup> )                                | 13.1                                                   | 13.4 | 4.4  | 5.2  | 5.5                                                        | 5.9  | 6.6  | 6.8  | 8.9                                                   | 9.0  | 5.3  | 5.6  | 9.9                                                   | 8.4  | 6.5  | 7.1  |
| Ligand atoms                                          | 6                                                      | 6    | 6    | 6    | 12                                                         | 12   | 12   | 12   | 11                                                    | 23   | 23   | 23   | 45                                                    | 36   | 47   | 47   |
| Bfac (Å <sup>2</sup> )                                | 17.0                                                   | 14.6 | 6.7  | 5.4  | 6.4                                                        | 7.0  | 7.0  | 7.2  | 15.4                                                  | 16.0 | 15.0 | 14.6 | 20.3                                                  | 17.3 | 15.7 | 18.0 |
| Water molecules                                       | 174                                                    | 154  | 169  | 151  | 218                                                        | 205  | 188  | 147  | 176                                                   | 177  | 185  | 143  | 221                                                   | 219  | 232  | 191  |
| Bfac (Å <sup>2</sup> )                                | 20.0                                                   | 18.3 | 18.6 | 19.5 | 20.7                                                       | 20.1 | 21.6 | 22.0 | 22.0                                                  | 22.4 | 22.3 | 22.2 | 24.9                                                  | 24.5 | 23.4 | 23.4 |
| Ramachandran plot :<br>Allowed /Favored /Outliers (%) | 100 / 97.1 / 0                                         |      |      |      | 100 / 97.2 / 0                                             |      |      |      | 99.6 / 97.1 / 2                                       |      |      |      | 100 / 97.1 / 0                                        |      |      |      |
| PDBcode                                               | 5A6Q                                                   |      |      |      | 5A6X                                                       |      |      |      | 5A6Y                                                  |      |      |      | 5A6Z                                                  |      |      |      |
